# Supplementary material for: A reconfigurable hyperbolic metamaterial perfect absorber
Source: Royal Society of Chemistry journal article supplement (doi:10.1039/d0na00787k), 2021-01-01
Supplement: d0na00787k1.pdf [file d0na00787k1.pdf]

# Supplementary Information

## A reconfigurable hyperbolic metamaterial perfect absorber

Jitendra K. Behera, Kuan Liu, Meng Lian, and Tun Cao, \*

\*E-mail: [caotun1806@dlut.edu.cn](mailto:caotun1806@dlut.edu.cn)

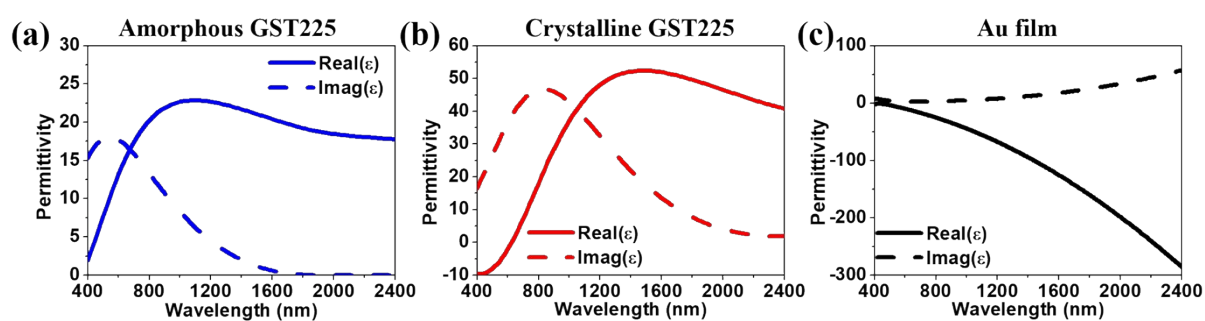

**Figure S1:** Experimentally measured dielectric permittivity as a function of wavelength (a) complex permittivity of amorphous GST225 (b) complex permittivity of crystalline GST225 (c) complex permittivity of Au film.

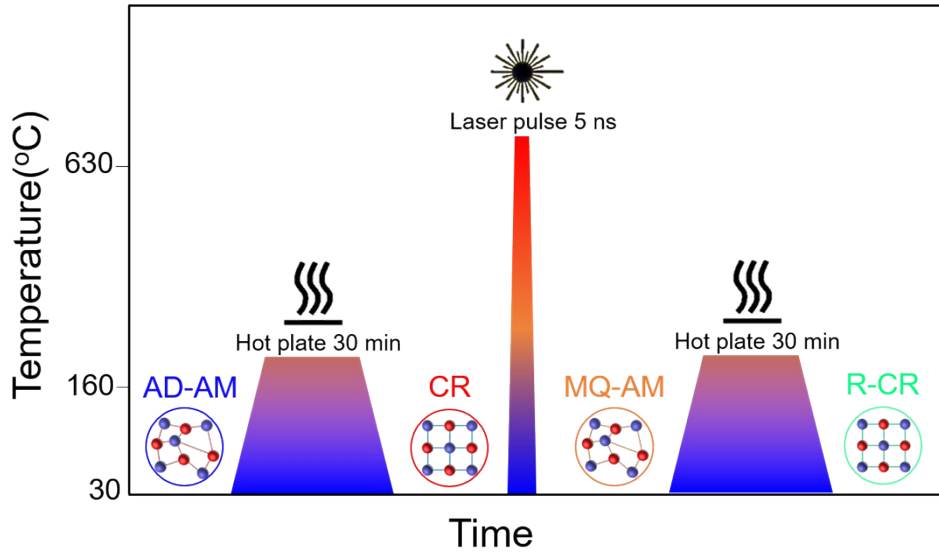

**Figure S2.** Schematic of the reversible phase change of the phase change HMM absorber: AD-AM GST225 is first annealed above 160 °C to change to CR-GST225 using a Linkam hot plate. A single ns laser pulse is triggered to heat the CR GST225 film above 630 °C that reamorphises the CR-GST225. Subsequent cooling provides the MQ-AM GST225. To recrystallise the MQ-AM GST225, for which a temperature above 160 °C but below 630 °C is required, the hotplate is again is employed.

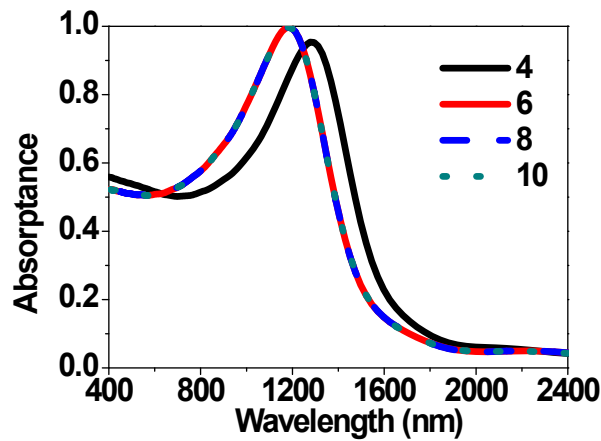

**Figure S3.** FDTD simulated absorbance of the HMM absorber for the amorphous state with  $P = 4, 6, 8, 10$ , where the absorbance spectra for  $P = 6, 8, 10$  are almost overlapped.
